# Supplementary material
Source: publisher figshare collection journal article supplement (https://acs.figshare.com/ndownloader/files/4975747)
Supplement: Supplementary file 1 [file 4975747]

**A First Principle Framework for Total Charging Energies in  
Electrocatalytic Materials and Charge-Responsive  
Molecular Binding at Gas-Surface Interfaces**

Xin Tan, Hassan A. Tahini, Prasenjit Seal, Sean C. Smith\*

*Integrated Materials Design Centre (IMDC), School of Chemical Engineering, UNSW Australia,*

*Sydney, NSW 2052, Australia*

---

\* Corresponding author: [sean.smith@unsw.edu.au](mailto:sean.smith@unsw.edu.au)

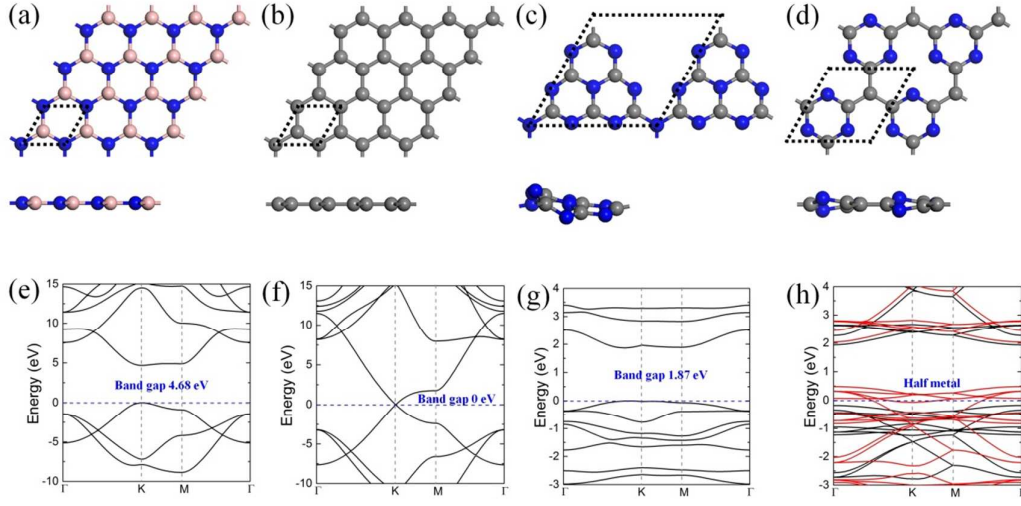

**Figure S1.** Top (upper) and side (lower) views of (a) a  $(4 \times 4)$   $h$ -BN supercell, (b) a  $(4 \times 4)$  graphene supercell, (c) a  $(2 \times 1)$  buckle  $g$ - $C_3N_4$  supercell, and (d) a  $(2 \times 2)$  reconstructed  $g$ - $C_4N_3$  supercell. The light magenta, blue and grey balls represent B, N and C atoms, respectively, and the unit cells of each supercell are indicated by black dot lines. The calculated band structures of (e) a  $(1 \times 1)$   $h$ -BN, (f) a  $(1 \times 1)$  graphene, (g) a  $(1 \times 1)$  buckled  $g$ - $C_3N_4$ , and (h) a  $(2 \times 2)$  reconstructed  $g$ - $C_4N_3$ . The blue dashed line denotes the Fermi level. The red and black lines in (h) denote the spin-up and spin-down states, respectively.

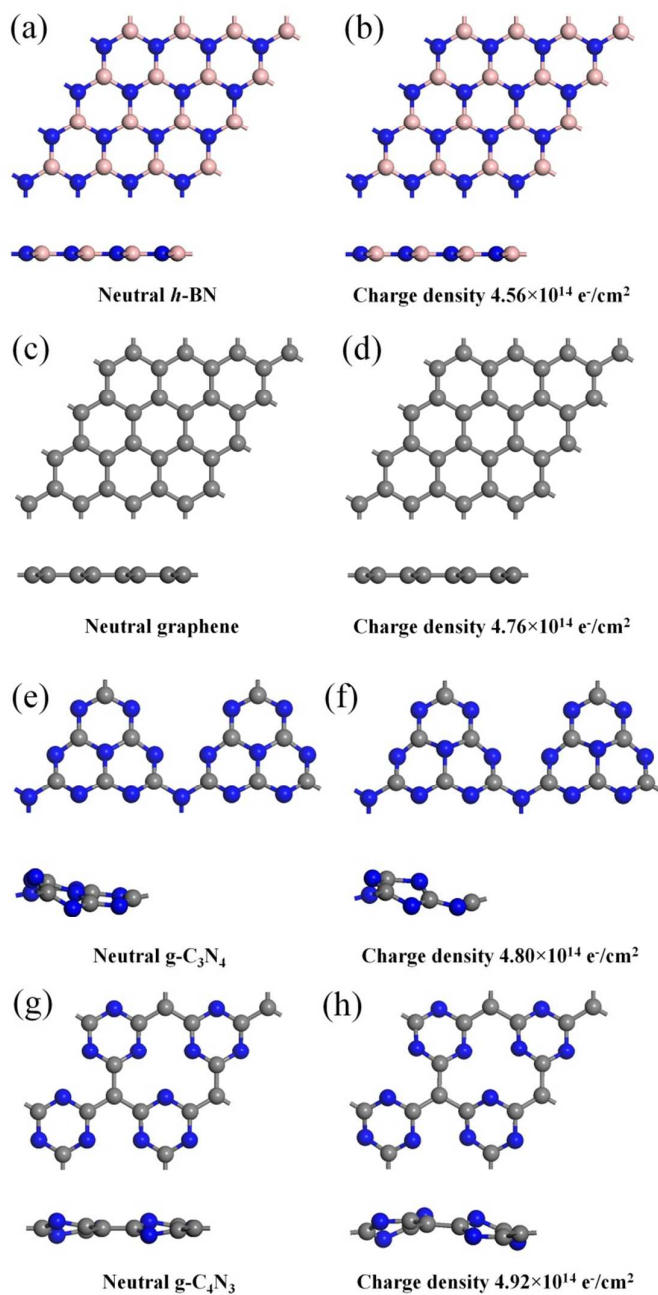

**Figure S2.** The optimized geometries of the (a) neutral and the (b) charged *h*-BN, the (c) neutral and the (d) charged graphene, the (e) neutral and the (f) charged g-C<sub>3</sub>N<sub>4</sub>, and the (g) neutral and the (h) charged g-C<sub>4</sub>N<sub>3</sub>. The charge densities are listed in the figures.

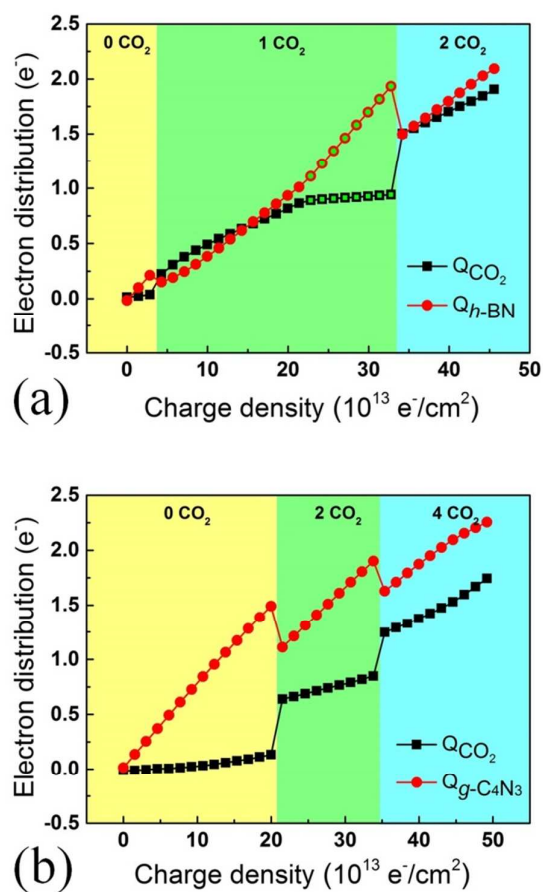

**Figure S3.** The electron distributions of CO<sub>2</sub> molecules on (a) *h*-BN and (b) g-C<sub>4</sub>N<sub>3</sub> as a function of charge density.  $Q_{CO_2}$ ,  $Q_{h-BN}$  and  $Q_{g-C_4N_3}$  indicate the number of excess electrons of CO<sub>2</sub>, *h*-BN and g-C<sub>4</sub>N<sub>3</sub>, respectively. The yellow, green and cyan regions in (a) denote 0, 1 and 2 CO<sub>2</sub> chemisorption. The yellow, green and cyan regions in (b) denote 0, 2 and 4 CO<sub>2</sub> chemisorption.
